# Supplementary material for: Achieving deep-red-to-near-infrared emissions in Sn-doped Cu–In–S/ZnS quantum dots for red-enhanced white LEDs and near-infrared LEDs
Source: Royal Society of Chemistry journal article supplement (doi:10.1039/c8nr01981a), 2018-01-01
Supplement: c8nr01981a1.pdf [file c8nr01981a1.pdf]

## Electronic Supplementary Information

### Achieving Deep-Red-to-Near-Infrared Emissions in Sn-doped Cu-In-S/ZnS Quantum Dots for Red-Enhanced White LEDs and Near-Infrared LEDs

Jixin Chen,<sup>a</sup> Ye Li,<sup>\*a</sup> Le Wang,<sup>\*b</sup> Tianliang Zhou,<sup>a</sup> and Rong-Jun Xie <sup>\*a</sup>

<sup>a</sup> College of Materials, Xiamen University, Xiamen 361005, China.

<sup>b</sup> College of Optics and Electronic Science and Technology, China Jiliang University, Hangzhou, Zhejiang 310018, China.

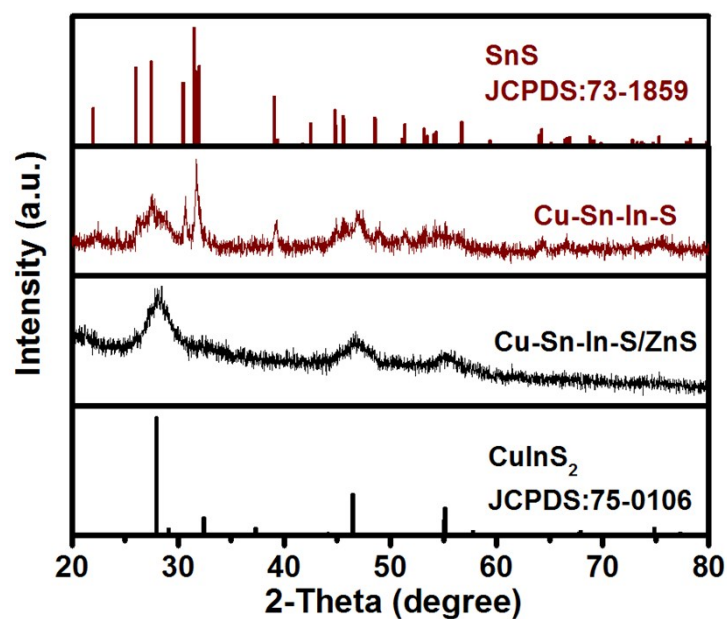

**Figure S1.** XRD patterns of Cu-Sn-In-S and Cu-Sn-In-S/ZnS QDs doped with 0.3 mmol Sn.

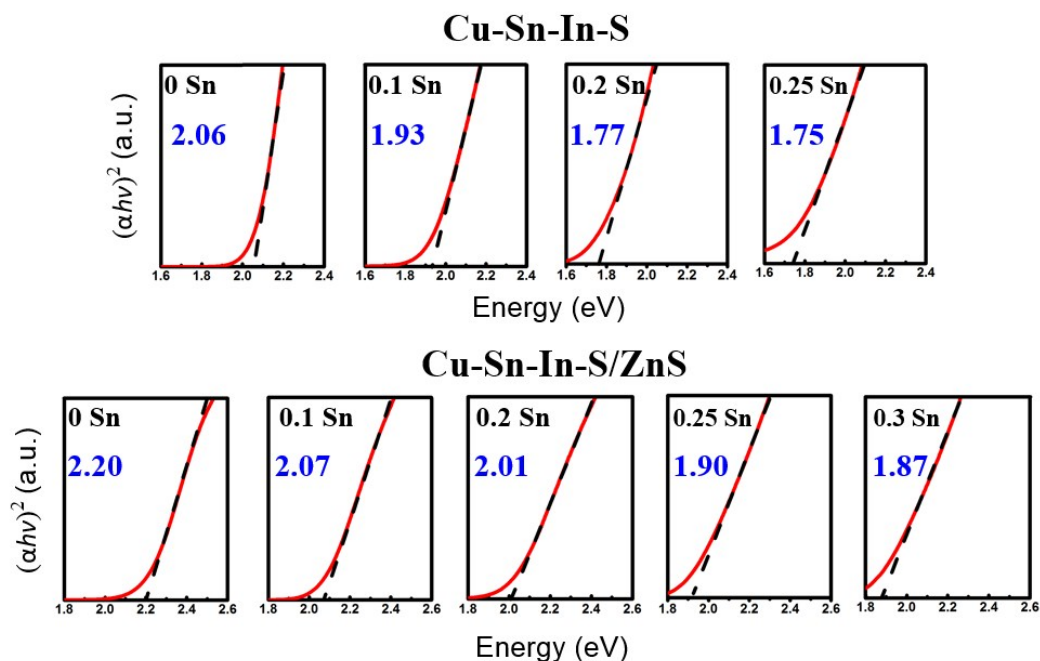

**Fig S2.** Band gaps of Cu-Sn-In-S and Cu-Sn-In-S/ZnS QDs with different amounts of Sn, derived from UV-visible absorption spectra.

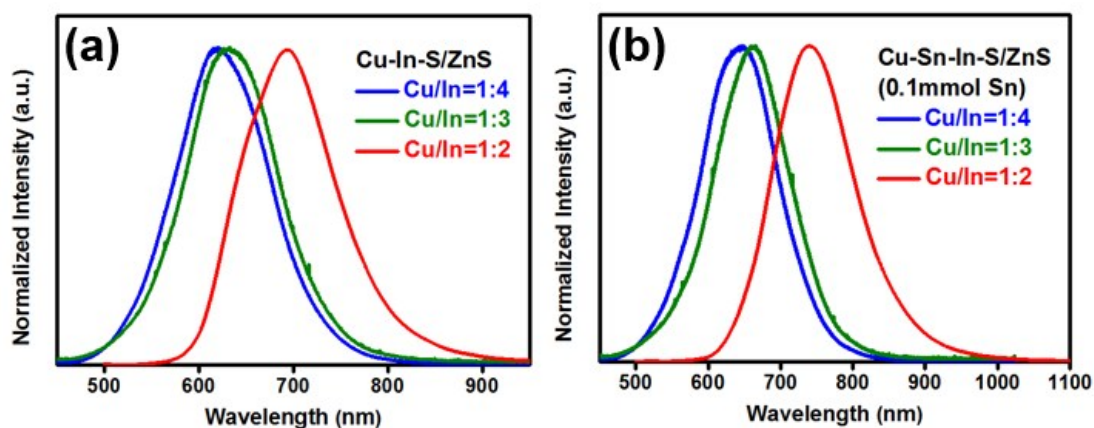

**Fig S3.** Normalized PL spectra of (a) Cu-In-S/ZnS and (b) Cu-Sn-In-S/ZnS QDs (0.1 mmol Sn) with different Cu/In molar ratios of 1/2, 1/3, and 1/4. The samples were excited at 365 nm for the PL emission spectrum measurements.
